# Supplementary material for: MicroRNA-5106-based nanodelivery to enhance osteogenic differentiation and bone regeneration of bone mesenchymal stem cells through targeting of Gsk-3α
Source: Royal Society of Chemistry journal article supplement (doi:10.1039/d1qm00367d), 2021-01-01
Supplement: d1qm00367d1.pdf [file d1qm00367d1.pdf]

**Supporting information**

**MicroRNA-5106-based Nanodelivery to Enhance Osteogenic Differentiation and Bone**

**Regeneration of Bone Mesenchymal Stem Cells through Targeting Gsk-3 $\alpha$**

Meng Yu <sup>a, b</sup>, Bo Lei <sup>a, b, c\*</sup>

<sup>a</sup> *State Key Laboratory for Mechanical Behavior of Materials, Xi'an Jiaotong University, Xi'an 710049, China*

<sup>b</sup> *Frontier Institute of Science and Technology, Xi'an Jiaotong University, Xi'an 710054, China*

<sup>c</sup> *National and Local Joint Engineering Research Center of Biodiagnosis and Biotherapy, The Second Affiliated Hospital of Xi'an Jiaotong University, Xi'an 710000, China*

\*Corresponding author: *B Lei, [rayboo@xjtu.edu.cn](mailto:rayboo@xjtu.edu.cn)*

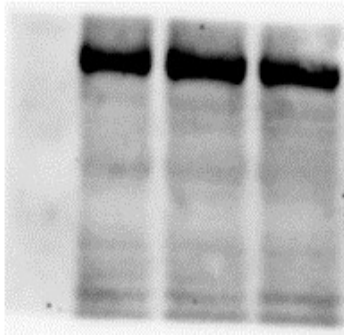

**Figure S1. Raw western blot image of RUNX2 protein in Figure 3D.**

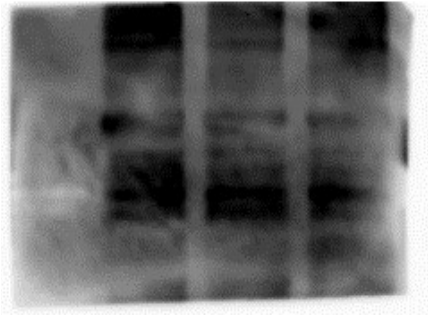

**Figure S2. Raw western blot image of OPN protein in Figure 3D.**

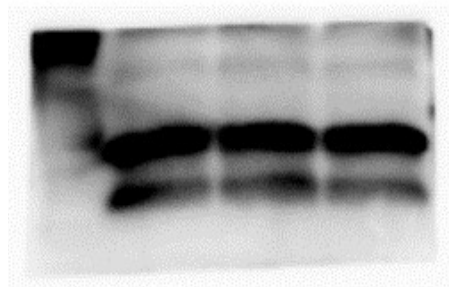

**Figure S3. Raw western blot image of GAPDH protein in Figure 3D.**

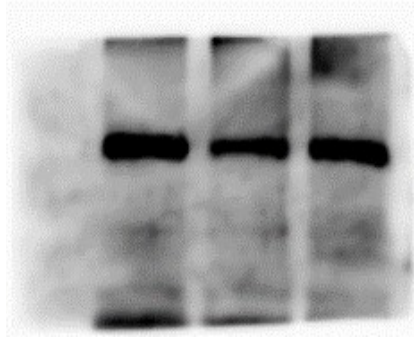

**Figure S4. Raw western blot image of GSK-3A protein in Figure 8D.**

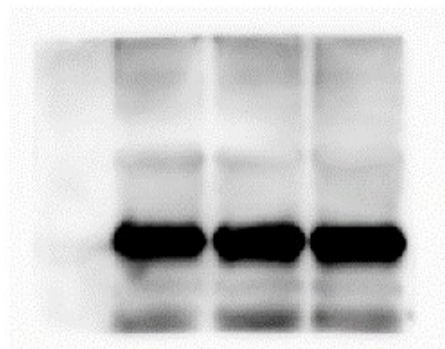

**Figure S5. Raw western blot image of GAPDH protein in Figure 8D.**
